# Supplementary material
Source: Springer Nature journal article supplement (https://www.springermedizin.de/resource/supplementary/12885_2012_3710_MOESM4_ESM.pdf/9465958)

A

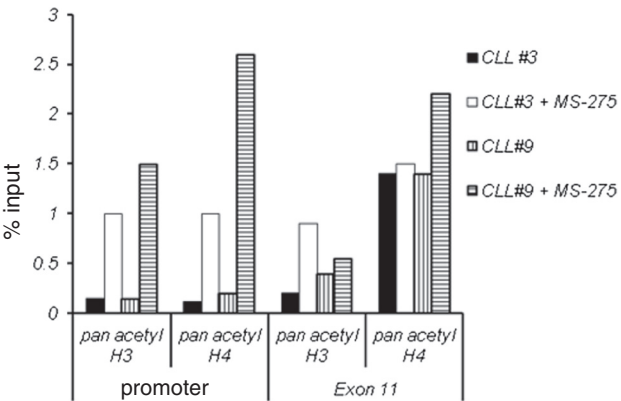

E-cadherin ChIP analysis

B

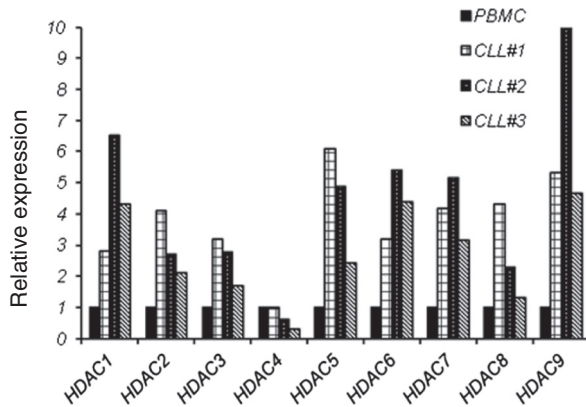

Real time PCR analysis

Supplement: MOESM4 [file 9465958]
